# Supplementary material for: Sex Differences in the Strategies of Tactile Object Memory in Early Adulthood
Source: Research Square preprint supplement (doi:10.21203/rs.3.rs-7796547/v1), 2025-10-29
Supplement: Supplementary file 1 [file 3079cd6ac1513f705cd1fe1d.docx]

| Dependent Variable | Female (*n* = 25) | Male (*n* = 17) |
| --- | --- | --- |
|  |  |  |
| *CVLT* |  |  |
| L1–L5 | 71.32 (SD = 7.96) | 66.65 (SD = 10.89) |
| VFWI | 13.80 (SD = 1.80) | 12.82 (SD = 2.07) |
| VFWII | 14.36 (SD = 1.47) | 12.65 (SD = 2.10) |
| Hits | 15.56 (SD = 0.77) | 15.71 (SD = 0.77) |
| False alarms | 0.18 (SD = 0.53) | 0.18 (SD = 0.53) |
|  |  |  |
| *TOM* |  |  |
| Encoding  Recall  Recognition by Vision | 1.75 (SD = 0.10)  1.69 (SD = 0.20)  0.46 (SD = 0.50) | 1.75 (SD = 0.11)  1.69 (SD = 0.16)  0.45 (SD = 0.50) |
| Recognition by Touch | 0.52 (SD = 0.21) | 0.52 (SD = 0.19) |
|  |  |  |
| *MRT* |  |  |
| Accuracy | 0.71 (SD = 0.09) | 0.75 (SD = 0.09) |
| Response time | 6093.11 (SD = 1460.70) | 7116.59 (SD = 1179.45) |
