# Supplementary material for: Sex Differences in the Strategies of Tactile Object Memory in Early Adulthood
Source: Research Square preprint supplement (doi:10.21203/rs.3.rs-7796547/v1), 2025-10-29
Supplement: Supplementary file 2 [file 36e4e46df5f147d3a5357ec5.docx]

| Multivariate Model: IV Encoding, Recall, Recognition by Vision and by Touch | SS | df | *F* | *p* | p2 | 95% CI [LB, UB)] |
| --- | --- | --- | --- | --- | --- | --- |
| Sex ** |  | 4 | 4.51 | **.006** | .37 | [.09, .52] |
| MRT Accuracy |  | 4 | 0.53 | .718 | .06 | [.00, .14] |
| CVLT Sum |  | 4 | 0.72 | .584 | .09 | [.00, .18] |
| Sex × MRT Accuracy** |  | 4 | 4.22 | **.008** | .35 | [.08, .51] |
| Sex × CVLT Sum** |  | 4 | 4.80 | .004 | .38 | [.11, .53] |
| MRT Accuracy × CVLT Sum |  | 4 | 0.62 | .655 | .07 | [.00, .16] |
| Sex × MRT Accuracy × CVLT** |  | 4 | 4.52 | **.005** | .37 | [.09, .52] |
| Total |  | 31 |  |  |  |  |
|  |  |  |  |  |  |  |
| Univariate Model: IV Encoding |  |  |  |  |  |  |
| Sex** | 0.10 | 1 | 11.51 | **.002** | .25 | [.07, .44] |
| MRT Accuracy** | 0.02 | 1 | 1.79 | .190 | .05 | [.00, .21] |
| CVLT Sum | 0.02 | 1 | 2.62 | .115 | .07 | [.00, .24] |
| Sex × MRT Accuracy** | 0.10 | 1 | 11.35 | **.002** | .25 | [.07, .44] |
| Sex × CVLT Sum** | 0.10 | 1 | 11.74 | **.002** | .26 | [.07, .44] |
| MRT Accuracy × CVLT Sum | 0.02 | 1 | 2.03 | .164 | .06 | [.00, .22] |
| Sex × MRT Accuracy × CVLT** | 0.10 | 1 | 11.72 | **.002** | .26 | [.07, .44] |
| Total | 0.30 | 34 |  |  |  |  |
|  |  |  |  |  |  |  |
| Univariate Model: IV Recall |  |  |  |  |  |  |
| Sex | 0.09 | 1 | 3.10 | .087 | .08 | [.00, .26] |
| MRT Accuracy | 0.01 | 1 | 0.44 | .512 | .01 | [.00, .03] |
| CVLT Sum | 0.02 | 1 | 0.58 | .451 | .02 | [.00, .14] |
| Sex × MRT Accuracy | 0.08 | 1 | 2.57 | .118 | .07 | [.00, .24] |
| Sex × CVLT Sum* | 0.13 | 1 | 4.21 | .048 | .11 | [.00, .29] |
| MRT Accuracy × CVLT Sum | 0.01 | 1 | 0.47 | .499 | .01 | [.00, .14] |
| Sex × MRT Accuracy × CVLT Sum | 0.11 | 1 | 3.65 | .064 | .10 | [.00, .27] |
| Total | 1.02 | 34 |  |  |  |  |
|  |  |  |  |  |  |  |
| Univariate Model: IV Recognition by Vision |  |  |  |  |  |  |
| Sex | 0.04 | 1 | 1.35 | .253 | .04 | [.00, .19] |
| MRT Accuracy | 0.03 | 1 | 0.93 | .343 | .03 | [.00, .17] |
| CVLT Sum | 0.03 | 1 | 1.07 | .308 | .03 | [.00, .17] |
| Sex × MRT Accuracy | 0.03 | 1 | 1.21 | .280 | .03 | [.00, .18] |
| Sex × CVLT Sum | 0.03 | 1 | 1.17 | .286 | .03 | [.00, .18] |
| MRT Accuracy × CVLT Sum | 0.02 | 1 | 0.70 | .408 | .02 | [.00, .15] |
| Sex × MRT Accuracy × CVLT Sum | 0.03 | 1 | 1.06 | .310 | .03 | [.00, .17] |
| Total | 0.96 | 34 |  |  |  |  |
|  |  |  |  |  |  |  |
| Univariate Model: IV Recognition by Touch |  |  |  |  |  |  |
| Sex | 0.06 | 1 | 1.97 | .170 | .05 | [.00, .22] |
| MRT Accuracy | 0.00 | 1 | 0.01 | .906 | <.01 | [.00, .04] |
| CVLT Sum | 0.00 | 1 | 0.01 | .920 | <.01 | [.00, .03] |
| Sex × MRT Accuracy | 0.04 | 1 | 1.42 | .241 | .04 | [.00, .19] |
| Sex × CVLT Sum | 0.08 | 1 | 2.48 | .124 | .07 | [.00, .24] |
| MRT Accuracy × CVLT Sum | 0.00 | 1 | 0.03 | .860 | <.01 | [.00, .06] |
| Sex × MRT Accuracy × CVLT Sum | 0.06 | 1 | 1.91 | .176 | .05 | [.00, .21] |
| Total | 1.04 | 34 |  |  |  |  |
