# Supplementary material for: Sex Differences in the Strategies of Tactile Object Memory in Early Adulthood
Source: Research Square preprint supplement (doi:10.21203/rs.3.rs-7796547/v1), 2025-10-29
Supplement: Supplementary file 3 [file f340391f063d67552c19378a.docx]

| *Item* | weight (g) | length × width × depth (mm) | Discrepancy from Target |  |
| --- | --- | --- | --- | --- |
| *Pen*  Schneider K15  Schneider FAVE  Schneider K20  Schneider Loox  **Schneider K1** | 6  8  10  12  12 | (9 × 135 × 9)  (10 × 140 × 10)  (11 × 143 × 11)  (10 × 135 × 10)  (11 × 144 × 11) | Dissimilar Small  Similar Small  Dissimilar Big  Similar Big  Target |  |
| *Screw*  INBUS DIN912 M10  INBUS DIN912 M10  INBUS DIN912 M14  **INBUS DIN912 M14**  INBUS DIN912 M16 | 8  12  28  34  50 | (10 × 40 × 10)  (10 × 56 × 10)  (14 × 73 × 14)  (14 × 88 × 14)  (16 × 80 × 16) | Dissimilar Small  Similar Small  Similar Big  Target  Dissimilar Big |  |
| *Stone*  Green Aventurin  **Lightblue Achat**  Darkbrown Mahagoniobsidian  Darkred Japsis  Darkblue Lapis Lazuli | 12  18  20  18  90 | (27 × 22 × 13)  (28 × 26 × 18)  (31 × 19 × 17)  (33 × 22 × 19)  (54 × 48 × 24) | Dissimilar Small  Target  Similar Big  Similar Small  Dissimilar Big |  |
| *Doorstop*  Rubber Grew  Rubber Grew  Rubber Grew  Rubber Grew  Rubber Grew | 1  2  4  6  10 | (6 × 15 × 6)  (9 × 20 × 9)  (15 × 20 × 15)  (24 × 20 × 24)  (24 × 24 × 24) | Dissimilar Small  Similar Small  Target  Similar Big  Dissimilar Big |  |
| *Key*  ***Number DOM H0 171***  Number Börkey 257NN  Number Burg 85  Number DOM 2H1837  Number FORT 45127 | 6  8  8  8  14 | (19 × 44 × 19)  (21 × 44 × 21)  (19 × 44 × 19)  (22 × 49 × 22)  (23 × 60 × 23) | Target  Dissimilar Small  Similar Small  Similar Big  Dissimilar Big |  |
| *Pipe*  Silver Metal  Silver Metal  Silver Metal  Silver Metal  Silver Metal | 6  16  22  24  14 | (8 × 80 × 8)  (10 × 80 × 10)  (12 × 80 × 12)  (16 × 80 × 16)  (18 × 80 × 18) | Dissimilar Small  Similar Small  Similar Big  Target  Dissimilar Big |  |
| *Pyramide Stone*  Pink Sandstone  Pink Sandstone  Pink Sandstone  Pink Sandstone  Pink Sandstone | 2  4  6  10  20 | (12 × 12 ×12)  (15 × 15 ×15)  (21 × 21 × 21)  (25 × 25 × 25)  (34 × 34 × 34) | Dissimilar Small  Similar Small  Target  Similar Big  Dissimar Big |  |
| *Coin*  *1-Cent*  *2-Cent*  ***10-Cent***  *50-Cent*  *2 Euro* | 2  3  4  8  9 | (16 × 16 × 1)  (19 × 19 × 1)  (20 × 20 × 2)  (24 × 24 × 2)  (26 × 26 × 2) | Dissimilar Small  Similar Small  Target  Similar Big  Dissimilar Big |  |
| *Grinding Disc*  Silicon Carbonad  Silicon Carbonad  Silicon Carbonad  **Silicon Carbonad**  Silicon Carbonad | 1  3  5  7  8 | (20 × 20 × 5)  (25 × 25 × 5)  (38 × 38 × 5)  (50 × 50 × 5)  (75 × 75 × 5) | Dissimilar Small  Similar Small  Similar Big  Target  Dissimilar Big |  |
| *Wood RIng*  Yellow  Orange  **Pink**  Red  Blue | 10  16  20  22  24 | (39 × 39 × 18)  (45 × 45 × 18)  (50 × 50 × 18)  (55 × 55 × 18)  (58 × 58 × 18) | Dissimilar Small  Similar Small  Target  Similar Big  Dissimilar Big |  |
